# Supplementary material for: Neoadjuvant and Adjuvant Chemotherapy for Variant Histology Bladder Cancers: A Systematic Review and Meta-Analysis
Source: Frontiers journal article supplement (doi:10.3389/fonc.2022.907454), 2022-07-14
Supplement: Data_Sheet_1.PDF [file Data_Sheet_1.PDF]

NAC:

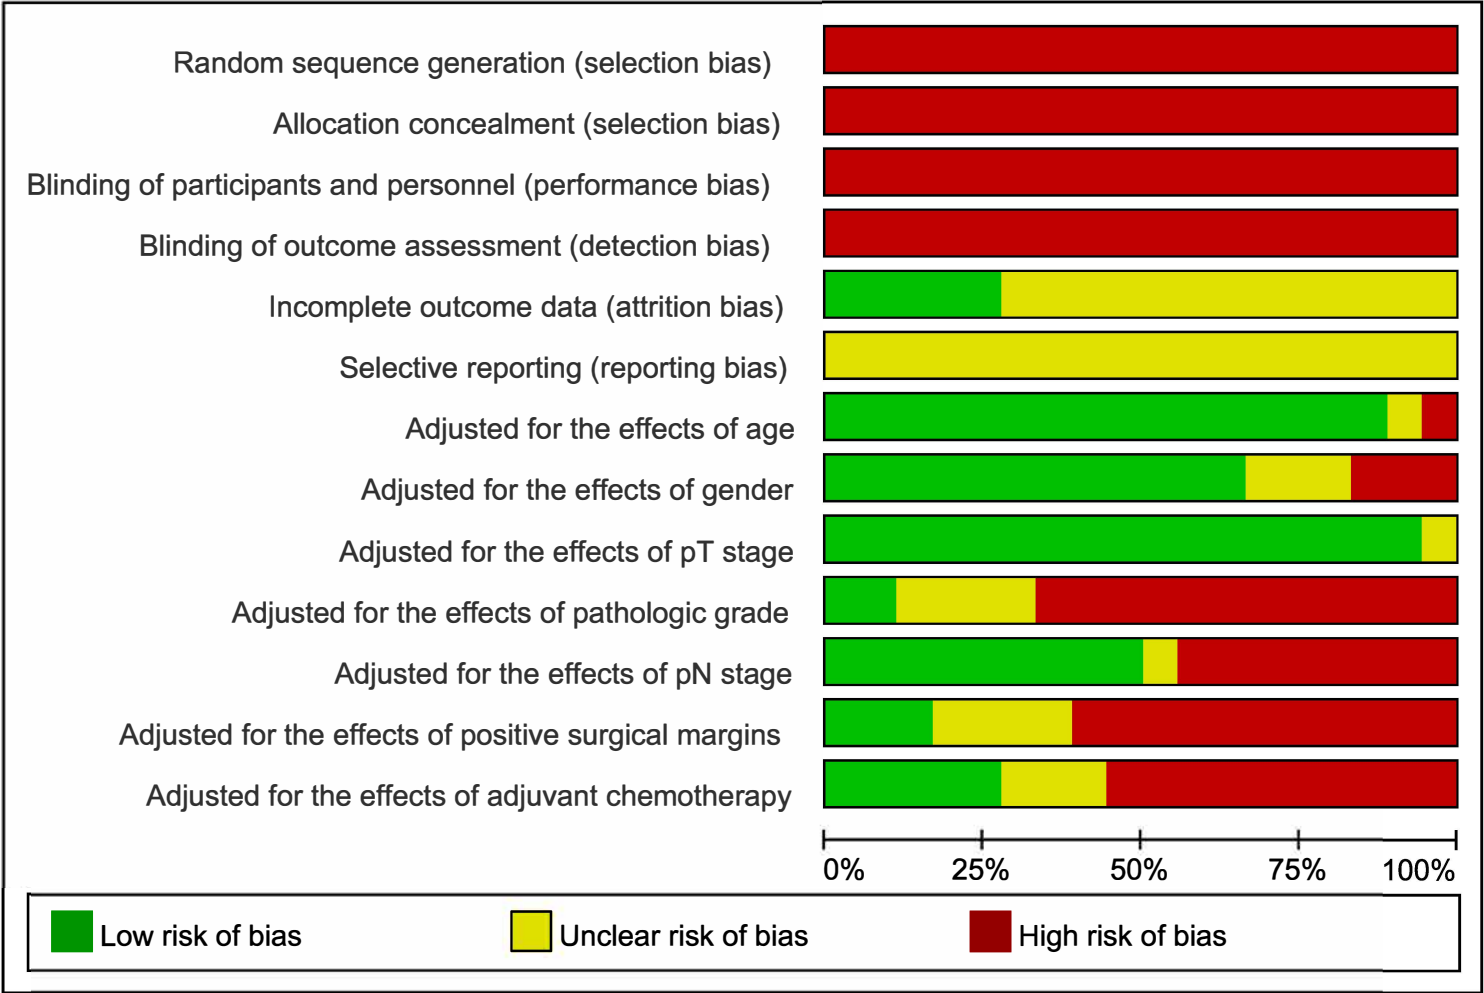

|                          | Random sequence generation (selection bias) | Allocation concealment (selection bias) | Blinding of participants and personnel (performance bias) | Blinding of outcome assessment (detection bias) | Incomplete outcome data (attrition bias) | Selective reporting (reporting bias) | Adjusted for the effects of age | Adjusted for the effects of gender | Adjusted for the effects of pT stage | Adjusted for the effects of pathologic grade | Adjusted for the effects of pN stage | Adjusted for the effects of positive surgical margins | Adjusted for the effects of adjuvant chemotherapy |
|--------------------------|---------------------------------------------|-----------------------------------------|-----------------------------------------------------------|-------------------------------------------------|------------------------------------------|--------------------------------------|---------------------------------|------------------------------------|--------------------------------------|----------------------------------------------|--------------------------------------|-------------------------------------------------------|---------------------------------------------------|
| Canvasser 2014           | -                                           | -                                       | -                                                         | -                                               | ?                                        | ?                                    | +                               | +                                  | +                                    | -                                            | -                                    | -                                                     | -                                                 |
| Chakiryan 2021           | -                                           | -                                       | -                                                         | -                                               | +                                        | ?                                    | +                               | +                                  | +                                    | -                                            | +                                    | -                                                     | -                                                 |
| Diamantopoulos 2021      | -                                           | -                                       | -                                                         | -                                               | ?                                        | ?                                    | +                               | +                                  | +                                    | -                                            | +                                    | +                                                     | -                                                 |
| Dotson 2019              | -                                           | -                                       | -                                                         | -                                               | ?                                        | ?                                    | +                               | -                                  | +                                    | -                                            | -                                    | -                                                     | -                                                 |
| El Latif 2013            | -                                           | -                                       | -                                                         | -                                               | ?                                        | ?                                    | +                               | +                                  | +                                    | -                                            | +                                    | +                                                     | -                                                 |
| Fernandez 2017           | -                                           | -                                       | -                                                         | -                                               | ?                                        | ?                                    | -                               | -                                  | +                                    | -                                            | -                                    | -                                                     | -                                                 |
| Gelpi-Hammerschmidt 2016 | -                                           | -                                       | -                                                         | -                                               | ?                                        | ?                                    | ?                               | ?                                  | ?                                    | ?                                            | ?                                    | ?                                                     | ?                                                 |
| Hajiran 2021             | -                                           | -                                       | -                                                         | -                                               | ?                                        | ?                                    | +                               | ?                                  | +                                    | ?                                            | +                                    | ?                                                     | ?                                                 |
| Joshi 2017               | -                                           | -                                       | -                                                         | -                                               | ?                                        | ?                                    | +                               | +                                  | +                                    | ?                                            | +                                    | ?                                                     | ?                                                 |
| Lin 2013                 | -                                           | -                                       | -                                                         | -                                               | ?                                        | ?                                    | +                               | +                                  | +                                    | -                                            | -                                    | +                                                     | -                                                 |
| Lynch 2013               | -                                           | -                                       | -                                                         | -                                               | +                                        | ?                                    | +                               | +                                  | +                                    | -                                            | -                                    | -                                                     | -                                                 |
| Matulay 2019             | -                                           | -                                       | -                                                         | -                                               | ?                                        | ?                                    | +                               | +                                  | +                                    | +                                            | -                                    | -                                                     | -                                                 |
| Mitra 2014               | -                                           | -                                       | -                                                         | -                                               | ?                                        | ?                                    | +                               | ?                                  | +                                    | ?                                            | +                                    | ?                                                     | +                                                 |
| Scosyrev 2011            | -                                           | -                                       | -                                                         | -                                               | +                                        | ?                                    | +                               | -                                  | +                                    | -                                            | +                                    | -                                                     | -                                                 |
| Stensland 2020           | -                                           | -                                       | -                                                         | -                                               | +                                        | ?                                    | +                               | +                                  | +                                    | -                                            | +                                    | -                                                     | +                                                 |
| Sui 2016                 | -                                           | -                                       | -                                                         | -                                               | ?                                        | ?                                    | +                               | +                                  | +                                    | +                                            | -                                    | -                                                     | +                                                 |
| Sui 2017                 | -                                           | -                                       | -                                                         | -                                               | ?                                        | ?                                    | +                               | +                                  | +                                    | -                                            | -                                    | -                                                     | +                                                 |
| Vetterlein 2017          | -                                           | -                                       | -                                                         | -                                               | +                                        | ?                                    | +                               | +                                  | +                                    | -                                            | +                                    | -                                                     | +                                                 |

AC:

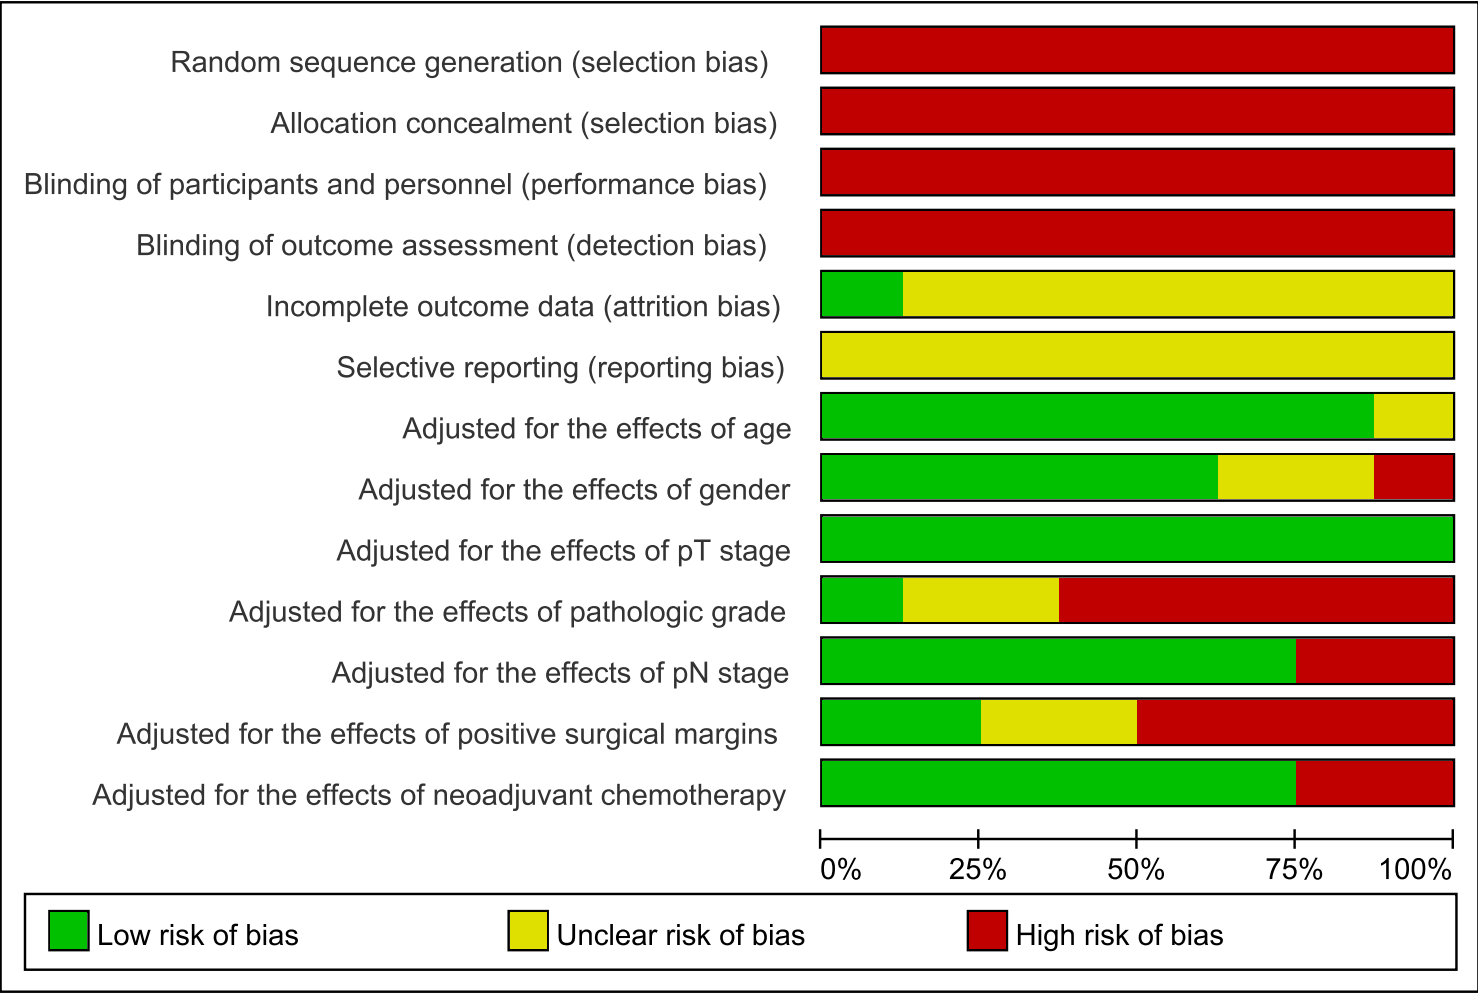

|                | Random sequence generation (selection bias) | Allocation concealment (selection bias) | Blinding of participants and personnel (performance bias) | Blinding of outcome assessment (detection bias) | Incomplete outcome data (attrition bias) | Selective reporting (reporting bias) | Adjusted for the effects of age | Adjusted for the effects of gender | Adjusted for the effects of pT stage | Adjusted for the effects of pathologic grade | Adjusted for the effects of pN stage | Adjusted for the effects of positive surgical margins | Adjusted for the effects of neoadjuvant chemotherapy |
|----------------|---------------------------------------------|-----------------------------------------|-----------------------------------------------------------|-------------------------------------------------|------------------------------------------|--------------------------------------|---------------------------------|------------------------------------|--------------------------------------|----------------------------------------------|--------------------------------------|-------------------------------------------------------|------------------------------------------------------|
| Berg 2019      | ⊖                                           | ⊖                                       | ⊖                                                         | ⊖                                               | ?                                        | ?                                    | +                               | +                                  | +                                    | ⊖                                            | +                                    | +                                                     | ⊖                                                    |
| Deuker 2020    | ⊖                                           | ⊖                                       | ⊖                                                         | ⊖                                               | ?                                        | ?                                    | +                               | ⊖                                  | +                                    | ⊖                                            | +                                    | ⊖                                                     | ⊖                                                    |
| Kaushik 2015   | ⊖                                           | ⊖                                       | ⊖                                                         | ⊖                                               | ?                                        | ?                                    | ?                               | ?                                  | +                                    | ?                                            | +                                    | ?                                                     | +                                                    |
| Mitra 2014     | ⊖                                           | ⊖                                       | ⊖                                                         | ⊖                                               | ?                                        | ?                                    | +                               | ?                                  | +                                    | ?                                            | +                                    | ?                                                     | +                                                    |
| Stensland 2020 | ⊖                                           | ⊖                                       | ⊖                                                         | ⊖                                               | +                                        | ?                                    | +                               | +                                  | +                                    | ⊖                                            | +                                    | ⊖                                                     | +                                                    |
| Sui 2016       | ⊖                                           | ⊖                                       | ⊖                                                         | ⊖                                               | ?                                        | ?                                    | +                               | +                                  | +                                    | +                                            | ⊖                                    | ⊖                                                     | +                                                    |
| Sui 2017       | ⊖                                           | ⊖                                       | ⊖                                                         | ⊖                                               | ?                                        | ?                                    | +                               | +                                  | +                                    | ⊖                                            | ⊖                                    | ⊖                                                     | +                                                    |
| Zamboni 2021   | ⊖                                           | ⊖                                       | ⊖                                                         | ⊖                                               | ?                                        | ?                                    | +                               | +                                  | +                                    | ⊖                                            | +                                    | +                                                     | +                                                    |
